# Supplementary material
Source: publisher site journal article supplement (https://www.spandidos-publications.com/6770/downloadSupplementary)
Supplement: Supplementary file 1 [file downloadSupplementary]

## Sheet: Supplementary_Table_SVI
Table SVI. Enriched pathways profiles of upregulated differentially expressed gene between Streptococcus-present and -absent cervical cancer.
Source	Term name	Adjusted P-value	Genes
KEGG	Metabolic pathways	5.61e-12	ACSS3, ADCY10, AKR1B10, AKR1C1, ALDH3A1, AMDHD1, CBR1, COX7A1, CYP1A1, CYP4F3, DGKG, ENPP6, G6PD, GAD1, GALT, GCLC, GCLM, GSTM3, HAO2, IDH1, MGAT4C, PLA2G4C, PLA2G6
KEGG	Glutathione metabolism	7e-06	G6PD, GCLC, GCLM, GSTM3, IDH1
KEGG	Arachidonic acid metabolism	8.11e-06	CBR1, CYP4F3, PLA2G4C, PLA2G6, PTGR1
KEGG	Metabolism of xenobiotics by cytochrome P450	1.72e-05	AKR1C1, ALDH3A1, CBR1, CYP1A1, GSTM3
KEGG	Chemical carcinogenesis - reactive oxygen species	0.000202861	AKR1C1, CBR1, COX7A1, CYP1A1, GSTM3, MAP3K14
KEGG	Wnt signaling pathway	0.000714575	BAMBI, CCND1, LEF1, NOTUM, SOST
KEGG	MAPK signaling pathway	0.000772336	FGF4, HSPA1A, HSPA1B, MAP3K14, NTRK2, PLA2G4C
KEGG	Ras signaling pathway	0.00197288	FGF4, GRIN2A, NTRK2, PLA2G4C, PLA2G6
KEGG	Calcium signaling pathway	0.00214488	CHRM5, FGF4, GRIN2A, NTRK2, RYR3
KEGG	Cell adhesion molecules	0.00317094	CD8B2, LRRC4C, SLITRK2, VCAM1
KEGG	Pathways in cancer	0.00645706	CCND1, FGF4, GSTM3, LEF1, TRAF1, TXNRD1
KEGG	Neuroactive ligand-receptor interaction	0.00727952	ADCYAP1R1, ADRA2A, CHRM5, F2RL2, GRIN2A
KEGG	Chemical carcinogenesis - receptor activation	0.00727952	CCND1, CYP1A1, FGF4, GSTM3
mSigDB	Fatty Acid Metabolism	0.00596729	ALDH3A1, CBR1, CPT1A, IDH1, CYP1A1, HAO2
mSigDB	Complement	0.0513947	DGKG, KCNIP2, SPOCK2, LTF, HSPA1A
mSigDB	mTORC1 Signaling	0.0513947	G6PD, GCLC, IDH1, TXNRD1, SLC7A11
mSigDB	heme Metabolism	0.0513947	SPTA1, GCLC, KEL, SLC7A11, GCLM
KEGG, Kyoto Encyclopedia of Genes and Genomes; mSigDB, Molecular Signatures Database.
